# Supplementary material for: Photoluminescence properties of a ScBO3:Cr3+ phosphor and its applications for broadband near-infrared LEDs
Source: Royal Society of Chemistry journal article supplement (doi:10.1039/c8ra01084f), 2018-01-01
Supplement: c8ra01084f1.pdf [file c8ra01084f1.pdf]

## Supporting Information

### **Photoluminescence Properties of $\text{ScBO}_3\text{:Cr}^{3+}$ Phosphor and its Applications for Broadband Near-Infrared LEDs**

Qiyue Shao,<sup>\*a</sup> Hao Ding,<sup>a</sup> Leqi Yao,<sup>a</sup> Junfeng Xu,<sup>b</sup> Chao Liang<sup>b</sup> and Jianqing Jiang<sup>c</sup>

<sup>a</sup> School of Materials Science and Engineering, Jiangsu Key Laboratory for Advanced Metallic Materials, Southeast University, Nanjing 211189, People's Republic of China

<sup>b</sup> Jiangsu Bree Optronics Co., Ltd., Nanjing 211103, People's Republic of China

<sup>c</sup> School of Materials Science and Engineering, Nanjing Forestry University, Nanjing 210037, People's Republic of China

<sup>\*</sup>Corresponding author.

*Email address:* qiyueshao@seu.edu.cn

Tel: 86-25-52090636; Fax: 86-25-52090634

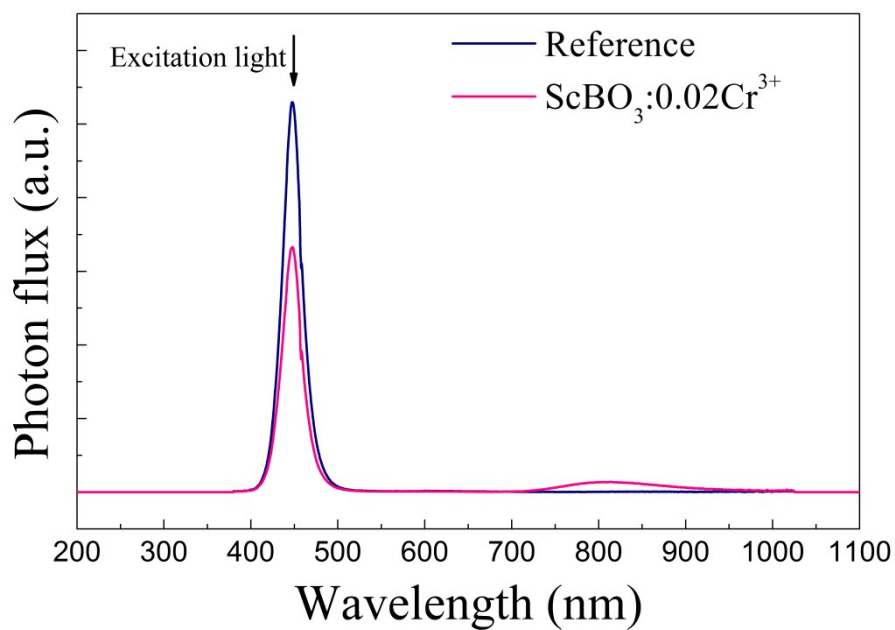

**Fig. S1** The quantitative excitation profiles and emission spectra of the  $\text{ScBO}_3:0.02\text{Cr}^{3+}$  phosphor and the reference sample under  $\sim 450$  nm excitation for quantum yield measurements.

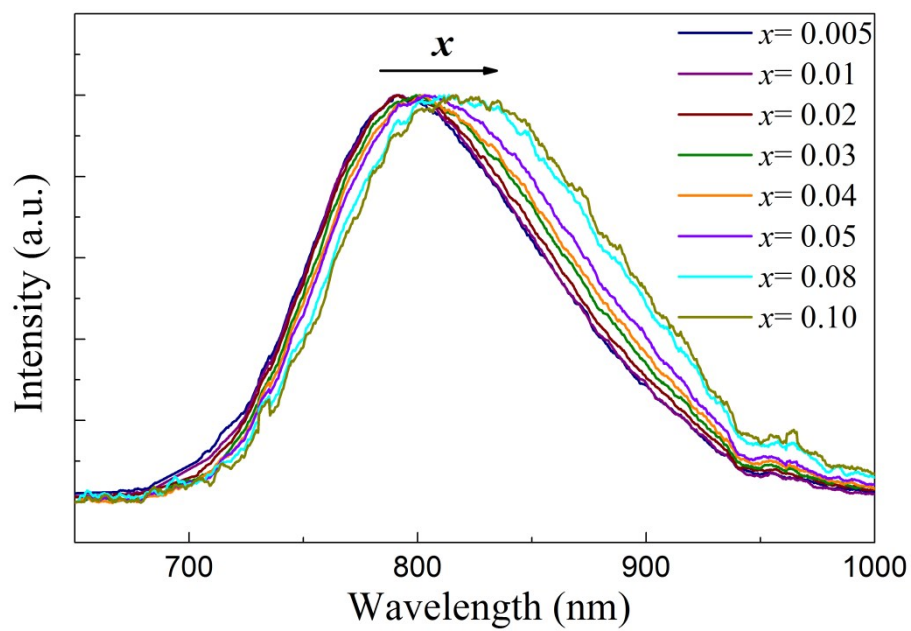

**Fig. S2** Normalized emission spectra of  $\text{ScBO}_3:x\text{Cr}^{3+}$  phosphors ( $x=0.005\text{--}0.1$ ) upon excitation at  $\sim 450$  nm.

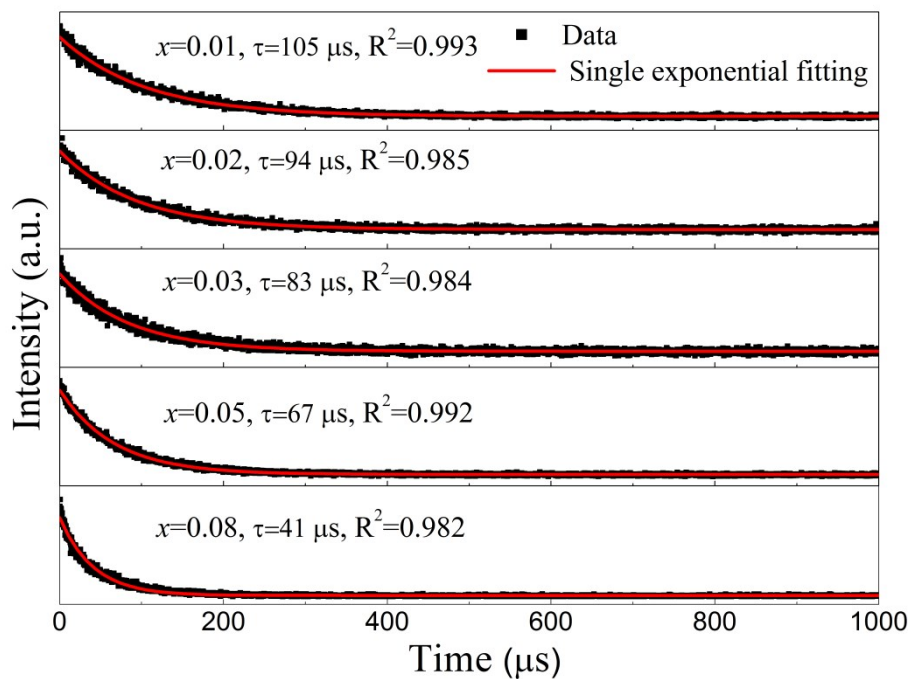

**Fig. S3** Luminescent decay curves of  $\text{ScBO}_3:x\text{Cr}^{3+}$  phosphors with various  $\text{Cr}^{3+}$  concentrations ( $\lambda_{\text{ex}} = 450 \text{ nm}$ ). All the decay curves can be well fitted by a single exponential function:

$$I = I_0 \exp\left(\frac{-t}{\tau}\right)$$
